# Supplementary material for: Toll-like receptor 10 (TLR10) exhibits suppressive effects on inflammation of prostate epithelial cells
Source: PubMed Central journal article supplement — Asian J Androl. 2019 Jan 1;21(4):393–9. doi: 10.4103/aja.aja_100_18 (PMC6628737; doi:10.4103/aja.aja_100_18), 2019-01-01
Supplement: AJA-21-393_Suppl1.pdf [file AJA-21-393_Suppl1.pdf]

## SUPPLEMENTARY INFORMATION

### Supplementary Methods

- **H and E staining**

1. Bake sections in oven at 65°C for 1 h
2. Deparaffinize sections in xylene for 10 min
3. Re-hydrate in absolute alcohol for 5 min, 95% alcohol and 70% alcohol for 2 min each
4. Wash briefly in distilled water
5. Stain in hematoxylin solution for 5 min
6. Wash in running tap water for 5 min
7. Differentiate in 1% acid alcohol for 10 s
8. Wash running tap water for 1 min
9. Bluing in 0.25% ammonia water for 2 min
10. Wash in running tap water for 5 min
11. Rinse in 75% alcohol for 10 s
12. Counterstain in eosin-phloxine solution for 30 s
13. Wash running tap water for 1 min
14. Dehydrate through 95% alcohol and absolute alcohol for 2 min each, then natural drying
15. Transparentizing in T0 transparent reagent I and II for 5 min each, then natural drying
16. Mount with neutral glue.

- **IHC staining**

1. Deparaffinization
  - i. At 65°C for 1 h: Bake sections in oven
  - ii. At room temperature (RT) 10 min each: wash slides in two changes of TO type transparent reagent.
2. Rehydration (at RT)
  - i. Three minutes: wash slides in 100% alcohol
  - ii. Three minutes: wash slides in 95% alcohol
  - iii. Three minutes: wash slides in 80% alcohol
  - iv. Five minutes: gently rinse slides using distilled water.
3. Antigen retrieval and blocking
  - i. At 97°C for 40 min: steam slides in 0.01 M sodium citrate buffer, pH 6.0
  - ii. At RT for 20 min: remove slides from heat and let cool in buffer
  - iii. At RT for 30 min: apply 3% H<sub>2</sub>O<sub>2</sub>-methanol solution
  - iv. At RT for 1 min: wash running tap water
  - v. At 37°C in thermostatic incubator for 30 min: apply 5% BSA block, and then drain the 5% BSA block from the slides.
4. Immunostaining
  - i. At 4°C in fridge for overnight: apply primary antibody: TLR2 (1:400; Nonus: NB100-56720), TLR10 (1:500; Thermo Fisher Scientific: PA5-20054), and HMGB1 (1:2000; Abcam: ab18256)
  - ii. At RT for 30 min: rewarm slides to RT
  - iii. At RT for 1 min each: wash slides in three changes of distilled water
  - iv. At 37°C in thermostatic incubator for 1 h: apply a biotinylated secondary antibody (AffiniPure Goat Anti-Rabbit IgG, Jackson)
  - v. At RT for 1 min each: wash slides in three changes of distilled water
  - vi. At RT for suitable time (controlled under microscope), apply DAB coloration kit
  - vii. At RT for 1 min each: wash slides in three changes of distilled water
  - viii. At RT for 5 min: Stain in hematoxylin
  - ix. At RT for 1 min each: wash slides in three changes of distilled water.
5. Dehydration (at RT)
  - i. One minute each: Wash slides in two changes of 80% alcohol
  - ii. One minute each: Wash slides in two changes of 95% alcohol
  - iii. One minute each: Wash slides in two changes of 100% alcohol
  - iv. One minute each: Wash slides in three changes of xylene
  - v. Apply coverslip.

- **Frozen section immunofluorescence**

- A prostate chip stored in liquid nitrogen was made into frozen section (5 µm). Section was treated in the following:
1. Fix in precooled 10% neutral buffered formalin for 5 min
  2. Wash in three changes of distilled water

3. At 37°C in thermostatic incubator for 30 min: apply 5% BSA block and then drain the 5% BSA block from the slides
4. At 4°C in fridge for overnight: apply primary antibody: TLR2 (1:400; Nonus: NB100-56720) and TLR10 (1:500; Thermo Fisher Scientific: PA5-20054)
5. At RT for 30 min: rewarm slides to RT
6. At RT for 1 min each: wash slides in three changes of distilled water
7. At 37°C in thermostatic incubator for 1 h: apply fluorescent secondary antibodies: Alexa Fluor 488 (Thermo Fisher Scientific) and Alexa Fluor 594 (Thermo Fisher Scientific)
8. At RT for 1 min each: wash slides in 3 changes of distilled water
9. At RT for 3 min: apply 0.1  $\mu\text{g ml}^{-1}$  DAPI (Sigama)
10. At RT for 1 min each: wash slides in three changes of distilled water
11. Mount with antifade mounting medium and store at 4°C in the dark.

- **Cell immunofluorescence**

Cells were plant on 12 well plates with slides to proliferate reaching about 80%. Slides were treated in the following:

1. At RT for 3 min each: shake and wash slides in three changes of PBS
2. At RT for 15 min: fix with 200  $\mu\text{l}$  4% paraformaldehyde (cover slides)
3. At RT for 3 min each: shake and wash slides in three changes of PBS
4. At RT for 3 min: permeabilization with 200  $\mu\text{l}$  0.2% Triton™ X-100
5. At RT for 3 min each: shake and wash slides in three changes of PBS
6. At RT for 30 min: apply 1% BSA block
7. At RT for 3 min each: shake and wash slides in three changes of PBS
8. At 37°C in thermostatic incubator for 1 h: apply 200  $\mu\text{l}$  primary antibodies (dissolved in the 1% BSA): TLR2 (1:400; Thermo Fisher Scientific: MA5-16200) and TLR10 (1:1000; Thermo Fisher Scientific: PA5-20054)
9. At RT for 3 min each: shake and wash slides in three changes of PBS
10. At 37°C in thermostatic incubator for 1 h: apply 200  $\mu\text{l}$  fluorescent secondary antibodies (dissolved in the PBS): Alexa Fluor 488 (Thermo Fisher Scientific) and Alexa Fluor 594 (Thermo Fisher Scientific)
11. At RT for 3 min each (keep in dark): shake and wash slides in 3 changes of PBS
12. At RT for 3 min (keep in dark): apply 0.1  $\mu\text{g ml}^{-1}$  DAPI (Sigama)
13. At RT for 3 min each (keep in dark): shake and wash slides in three changes of PBS
14. At RT for 1 min each (keep in dark): wash slides in two changes of distilled water
15. Mount with antifade mounting medium and store at 4°C in the dark.

**Note:** Skip permeabilization (4 and 5) when staining proteins on the plasma membrane.

- **RNA extraction, reverse transcription and qRT-PCR**

1. Total RNAs of collected prostate tissues or RWPE-1 cells were extracted with TRIzol
2. cDNAs were synthesis with iscript cDNA Sythesis Kit (Bio-rad)

One 20  $\mu\text{l}$  reaction include:

|                              |                  |
|------------------------------|------------------|
| 5x Iscript reaction mix      | 4 $\mu\text{l}$  |
| Iscrip reverse transcriptase | 1 $\mu\text{l}$  |
| Nuclease-free water          | x $\mu\text{l}$  |
| RNA template                 | 1 $\mu\text{g}$  |
| Total volume                 | 20 $\mu\text{l}$ |

3. Program Settings: 25°C 5 min; 42°C 30 min; 85°C 5 min; 12°C  $\infty$ . After reverse transcription, cDNA solutions were diluted 5 times with 80  $\mu\text{l}$  RNase-free water.
4. Primers were follows:
  - Human TLR2 primer (100 bp):
    - Forward 5'-GATGCCTACTGGGTGGAGAA-3';
    - Reverse 5'-CGCAGCTCTCAGATTTACCC-3'.
  - Human TLR10 primer (115 bp):
    - Forward 5'-TCTCCACTTTGATCTGCCCT-3';
    - Reverse 5'-TGCGTGGAATCGGACATTTTC-3'.
  - Human HMGB1 (163 bp):
    - Forward 5'- AGAGCGGAGAGAGTGAGGAG-3';
    - Reverse 5'- GATCTCCTTTGCCCATGTTT-3'.
  - Human IL-6 (342 bp):
    - Forward 5'- CAAATTCGGTACATCCTCGAC-3';
    - Reverse 5'-CTACGTTATTGGTGGGGACTG-3'.
  - Human IL-8 (302 bp):

Forward 5'- ATGACTTCCAAGCTGGCCGTG-3';  
Reverse 5'-CTCTTCAAAAACTTCTCCCGACTCTTAAGTATT -3'.

Human PCNA (307 bp):

Forward 5'-GACACATACCGCTGCGATCG-3';  
Reverse 5'-TCACCACAGCATCTCCAATAT-3'.

Human  $\beta$ -actin (342 bp):

Forward 5'- GCATGGAGTCCTGTGGCAT-3';  
Reverse 5'-CTAGAAGCATTGCGGTGG-3'.

5. Primers were diluted to 10  $\mu$ M. PCR reactions used for three-step PCR were follows:

|                    |             |
|--------------------|-------------|
| 2x mix             | 5 $\mu$ l   |
| cDNA               | 2 $\mu$ l   |
| ddH <sub>2</sub> O | 2 $\mu$ l   |
| P1 (10 $\mu$ M)    | 0.5 $\mu$ l |
| P2 (10 $\mu$ M)    | 0.5 $\mu$ l |
| Total volume       | 10 $\mu$ l  |

- **Western blot**

1. Cells and prostate tissues were ground into powder in liquid nitrogen. RIPA lyste solution was then used to prepare cell/tissue lysates
2. Protein concentration was measured with BCA Protein Assay Kit (Beyotime Biotechnology)
3. Sodium dodecyl sulfate polyacrylamide gel electrophoresis (SDS-PAGE), transfer membrane, blocking
4. Primary antibodies incubation: TLR2 (1:1000; CST: 12276), TLR10 (1:250; R&D: MAB6619), phospho-NF- $\kappa$ B P65 (1:1000; CST: 3033T) and NF- $\kappa$ B P65 (1:1000; CST: 8242T)
5. Correspondent secondary antibodies incubation;
6. Chemiluminescence detection.

- **ELISA**

Supernatants were collected for ELISA test. Manipulations were followed the instructions strictly;

1. Adding samples: samples were added to accommodate a blank, a standard and test sample in the wells of the ELISA plates (100  $\mu$ l well<sup>-1</sup>)
2. Adding antibodies: biotinylated antibodies (IL-6, IL-8, or HMGB1) were placed into the wells (50  $\mu$ l well<sup>-1</sup>). Plates were put in thermostatic incubator for 1.5 h (at 37°C)
3. Washing: wells were rinsed with 4 charges of washing buffer (300  $\mu$ l well<sup>-1</sup>)
4. Adding enzyme: streptavidin-HRP was added (100  $\mu$ l well<sup>-1</sup>). Plates were put in thermostatic incubator for 0.5 h (at 37°C)
5. Washing: repeat step 3
6. Coloration: TMB was added for coloration (100  $\mu$ l well<sup>-1</sup>). Plates were put in thermostatic incubator for 5–30 min (at 37°C, keep in dark). Termination of the reaction was according to the color depth of the holes
7. Terminate reaction: stop solution was added to terminate reaction (100  $\mu$ l well<sup>-1</sup>)
8. Immediately (within 10 min) placed the plate into the socket of ELISA instrument and measured at  $\lambda = 450$  nm.
